# Supplementary material for: Influence of 2-Nitroimidazoles in the Response of FaDu Cells to Ionizing Radiation and Hypoxia/Reoxygenation Stress
Source: MDPI journal article supplement (doi:10.3390/antiox12020389), 2023-02-06
Supplement: s1 [file s1]

## Supplementary information

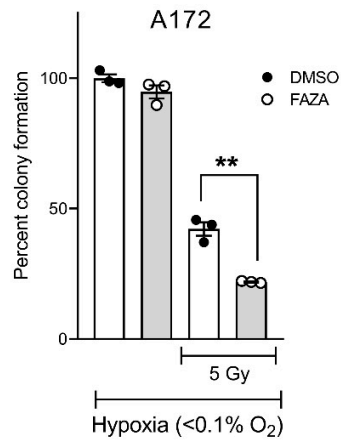

**Figure S1. FAZA radiosensitizes hypoxic glioblastoma cells.** A glioblastoma cell line (A172; kindly provided by Dr. Roseline Godbout, University of Alberta, Canada) was used to assess the hypoxic radiosensitization potential of FAZA. Hypoxic cells treated with FAZA (100  $\mu$ M) for 4 h were subjected to 5 Gy of IR, and allowed to recover and form colonies for 14 days. Colonies were stained with crystal violet, counted and normalized to the colony counts in the unirradiated DMSO treated conditions. A shorter duration was chosen to minimize the cytotoxic effects of the drug to better illustrate its effect on the radiation arm.

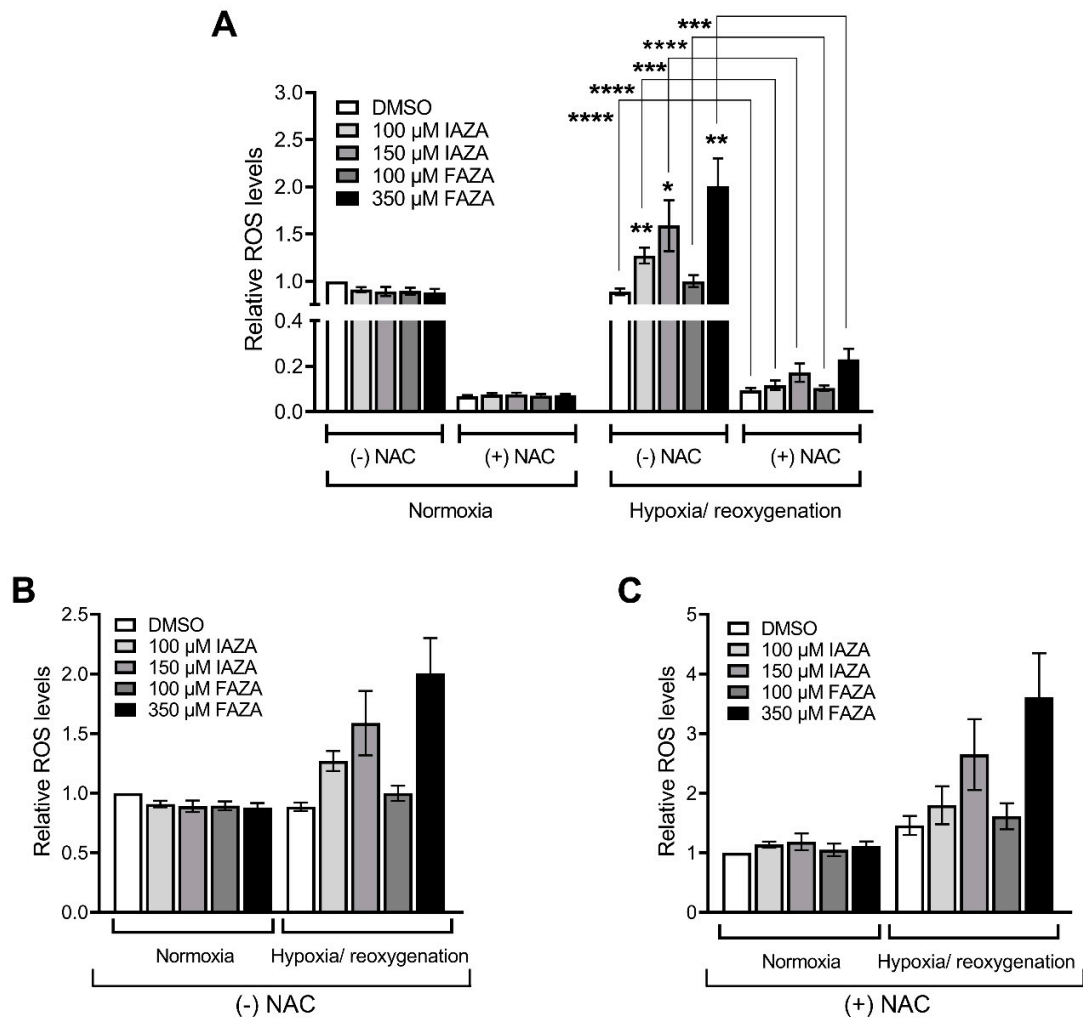

**Figure S2. High levels of ROS in IAZA-/FAZA-treated hypoxic/reoxygenated cells.** (A) A significant increase in  $\text{H}_2\text{O}_2$  levels was found in drug-treated reoxygenated cells, which could be quenched if reoxygenation was carried out in the presence of 3 mM N-acetylcysteine (NAC). Relative fold change in cellular ROS levels in cells not subjected to NAC (B) and 3 mM NAC (C) retained a similar trend. Data represent the mean  $\pm$  S.E.M. from three independent replicates.
